# Supplementary material
Source: publisher figshare collection journal article supplement (https://springernature.figshare.com/ndownloader/files/19073177)
Supplement: Supplementary file [file 19073177]

**Additional file 1**  
**for**  
**A simple strategy to effectively produce D-lactate in crude**  
**glycerol-utilizing *Escherichia coli***

Yao-De Wang,<sup>1</sup> Jin-Yi Liao,<sup>1</sup> Chung-Jen Chiang,<sup>2,\*</sup> and Yun-Peng Chao,<sup>1,3,4\*</sup>

<sup>1</sup>Department of Chemical Engineering, Feng Chia University, 100 Wenhwa Road, Taichung, Taiwan 40724

<sup>2</sup>Department of Medical Laboratory Science and Biotechnology, China Medical University, No. 91, Hsueh-Shih Road, Taichung, Taiwan 40402

<sup>3</sup>Department of Medical Research, China Medical University Hospital, Taichung 40447, Taiwan

<sup>4</sup>Department of Health and Nutrition Biotechnology, Asia University, Taichung 41354, Taiwan

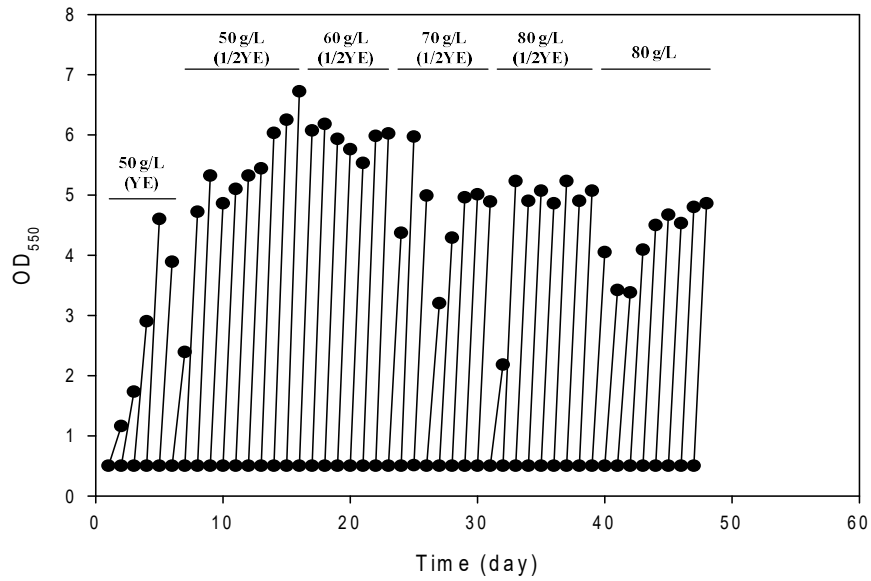

Figure S1 The time course of the *E. coli* strain undergoing adaptive evolution. The strain was first cultured in a shake flask containing crude glycerol (50 g/L) plus yeast extract (YE) of 10 g/L. The serial subculture was performed every 24 h. During the evolution course, YE was reduced by half (1/2 YE) and crude glycerol was gradually increased as indicated. Finally, the strain was transferred to the medium containing 80 g/L crude glycerol without YE.
